# Supplementary material for: Discordant hepatic fatty acid oxidation and triglyceride hydrolysis leads to liver disease
Source: PubMed Central journal article supplement (PMC7934875; doi:10.1172/jci.insight.135626), 2021-01-25
Supplement: jciinsight-6-135626-s087.pdf [file jciinsight-6-135626-s087.pdf]

Supp Figure 1. H&E and Trichrome staining of Liver Specific Double Knockout mice.

**Cpt2<sup>L-/-</sup>;Atgl<sup>L-/-</sup>**

**H&E**

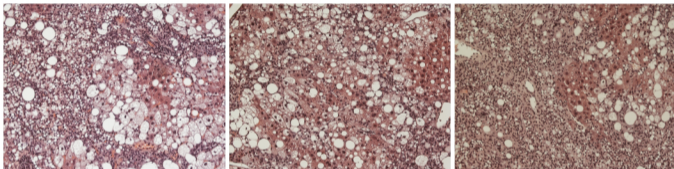

**Trichrome**

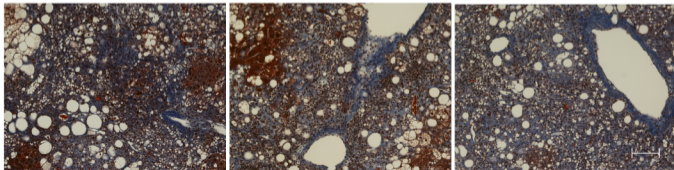

















|                                            |        |            |           |                                                                          |
|--------------------------------------------|--------|------------|-----------|--------------------------------------------------------------------------|
| 1213-DiHOME                                | 7.2645 | 0.00050242 | 0.0012973 | PPAR-a-Atgl cff; PPAR-a-Cpt2 cff; PPAR-a-ff:ff; PPAR-a-ff:ff Cre         |
| pyridoxamine                               | 7.2621 | 0.00050346 | 0.0012973 | ff:ff Cre-Atgl cff; PPAR-a-Atgl cff; ff:ff Cre-ff:ff; PPAR-a-ff:ff       |
| nicotinatetrinucleoside                    | 7.256  | 0.00050614 | 0.0013001 | Cpt2 cff-Atgl cff; ff:ff Cre-Atgl cff; PPAR-a-Cpt2 cff; PPAR-a-ff:ff Cre |
| dodecaenedioateC12                         | 7.2404 | 0.00051306 | 0.0013138 | PPAR-a-Atgl cff; PPAR-a-Cpt2 cff; PPAR-a-ff:ff; PPAR-a-ff:ff Cre         |
| N-acetylcysteine                           | 7.2229 | 0.00052095 | 0.0013264 | Cpt2 cff-Atgl cff; ff:ff Cre-Atgl cff; PPAR-a-Atgl cff; PPAR-a-ff:ff     |
| O-sulfo-L-tyrosine                         | 7.2223 | 0.00052121 | 0.0013264 | PPAR-a-Cpt2 cff; PPAR-a-ff:ff Cre                                        |
| N-palmitoylglycine                         | 7.209  | 0.0005273  | 0.0013378 | Cpt2 cff-Atgl cff; ff:ff Cre-Atgl cff; PPAR-a-Atgl cff                   |
| glycine                                    | 7.2041 | 0.00052958 | 0.0013385 | PPAR-a-Atgl cff; ff:ff Cre-ff:ff; PPAR-a-ff:ff                           |
| linoleoyl-linolenoyl-glycerol182/1831      | 7.2014 | 0.00053082 | 0.0013385 | ff:ff-Atgl cff; ff:ff Cre-Atgl cff; PPAR-a-ff:ff; PPAR-a-ff:ff Cre       |
| N-octanoylglycine                          | 7.1925 | 0.00053498 | 0.0013448 | ff:ff Cre-Atgl cff; PPAR-a-Cpt2 cff; PPAR-a-ff:ff Cre                    |
| N-acetylglytamine                          | 7.1614 | 0.00054972 | 0.0013758 | Cpt2 cff-Atgl cff; ff:ff Cre-Atgl cff; ff:ff-Cpt2 cff; ff:ff Cre-ff:ff   |
| phosphate                                  | 7.1595 | 0.00055064 | 0.0013758 | ff:ff-Cpt2 cff; ff:ff Cre-ff:ff                                          |
| tiglylcarnitineC5                          | 7.1292 | 0.00056544 | 0.0014084 | PPAR-a-Atgl cff; ff:ff-Cpt2 cff; ff:ff Cre-ff:ff; PPAR-a-ff:ff           |
| taurochenodeoxycholate                     | 7.1201 | 0.00056997 | 0.0014144 | Cpt2 cff-Atgl cff; ff:ff Cre-Atgl cff; PPAR-a-Atgl cff                   |
| 1-palmitoyl-2-linoleoyl-GPC160/182         | 7.1175 | 0.00057127 | 0.0014144 | PPAR-a-Cpt2 cff; ff:ff Cre-ff:ff; PPAR-a-ff:ff Cre                       |
| 3-amino-2-piperidone                       | 7.0971 | 0.00058161 | 0.0014332 | PPAR-a-Cpt2 cff; PPAR-a-ff:ff                                            |
| S-3-hydroxypropylmercapturicacidHPMA       | 7.0957 | 0.00058235 | 0.0014332 | PPAR-a-Atgl cff; PPAR-a-Cpt2 cff; PPAR-a-ff:ff; PPAR-a-ff:ff Cre         |
| pyridoxaminephosphate                      | 7.0767 | 0.00059216 | 0.001453  | PPAR-a-Atgl cff; PPAR-a-Cpt2 cff; PPAR-a-ff:ff Cre                       |
| sphingomyelind180/180d190/170              | 7.0143 | 0.00062565 | 0.0015306 | ff:ff Cre-Cpt2 cff; PPAR-a-Cpt2 cff                                      |
| glycylvaline                               | 7.0061 | 0.00063021 | 0.0015372 | PPAR-a-Cpt2 cff; ff:ff Cre-ff:ff; PPAR-a-ff:ff                           |
| stearoylcarnitineC18                       | 6.973  | 0.00064897 | 0.0015783 | Cpt2 cff-Atgl cff; ff:ff-Cpt2 cff; PPAR-a-Cpt2 cff; ff:ff Cre-ff:ff      |
| betainealdehyde                            | 6.8543 | 0.00072124 | 0.0017489 | ff:ff-Atgl cff; ff:ff-Cpt2 cff; ff:ff Cre-ff:ff; PPAR-a-ff:ff            |
| octadecadienedioateC182-DC                 | 6.7934 | 0.00076171 | 0.0018395 | PPAR-a-Atgl cff; PPAR-a-Cpt2 cff; PPAR-a-ff:ff; PPAR-a-ff:ff Cre         |
| glutamine                                  | 6.7913 | 0.0007631  | 0.0018395 | ff:ff-Atgl cff; PPAR-a-Atgl cff; ff:ff-Cpt2 cff; ff:ff Cre-ff:ff         |
| sphingomyelind181/181d182/180              | 6.7646 | 0.00078166 | 0.0018787 | PPAR-a-Cpt2 cff; PPAR-a-ff:ff; PPAR-a-ff:ff Cre                          |
| alpha-hydroxyisovalerate                   | 6.7454 | 0.00079528 | 0.0019059 | ff:ff Cre-Atgl cff; PPAR-a-ff:ff Cre                                     |
| isobarhexosediphosphates                   | 6.5819 | 0.00092213 | 0.0022035 | PPAR-a-Cpt2 cff; PPAR-a-ff:ff Cre                                        |
| uridine5-diphosphateUDP                    | 6.5741 | 0.00092866 | 0.0022126 | Cpt2 cff-Atgl cff; ff:ff Cre-Atgl cff; PPAR-a-Atgl cff                   |
| glycosyl-N-nervonoyl-sphingosined181/241   | 6.5409 | 0.00095725 | 0.0022742 | PPAR-a-Atgl cff; PPAR-a-Cpt2 cff; PPAR-a-ff:ff; PPAR-a-ff:ff Cre         |
| stearoyl-docosahexaenoyl-glycerol180/2262  | 6.53   | 0.00096675 | 0.0022901 | ff:ff-Atgl cff; ff:ff-Cpt2 cff; ff:ff Cre-ff:ff                          |
| cis-4-decenylcarnitineC101                 | 6.4681 | 0.0010231  | 0.0024166 | Cpt2 cff-Atgl cff; ff:ff Cre-Atgl cff; ff:ff-Cpt2 cff; ff:ff Cre-ff:ff   |
| 1-arachidonoyl-GPI204                      | 6.4583 | 0.0010324  | 0.0024315 | PPAR-a-Atgl cff; ff:ff-Cpt2 cff; PPAR-a-ff:ff; PPAR-a-ff:ff Cre          |
| N-acetyl-3-methylhistidine                 | 6.4208 | 0.0010686  | 0.0025096 | PPAR-a-Cpt2 cff; PPAR-a-ff:ff Cre                                        |
| 3-ureidopropionate                         | 6.4128 | 0.0010765  | 0.002521  | Cpt2 cff-Atgl cff; ff:ff-Cpt2 cff; PPAR-a-Cpt2 cff                       |
| N-acetyl-1-methylhistidine                 | 6.3358 | 0.0011557  | 0.0026989 | PPAR-a-Atgl cff; PPAR-a-Cpt2 cff; PPAR-a-ff:ff; PPAR-a-ff:ff Cre         |
| 1-oleoyl-GPI181                            | 6.3145 | 0.0011788  | 0.0027449 | ff:ff Cre-Atgl cff; PPAR-a-Atgl cff; ff:ff Cre-ff:ff                     |
| entrolactone                               | 6.293  | 0.0012025  | 0.0027923 | Cpt2 cff-Atgl cff; PPAR-a-Atgl cff; ff:ff-Cpt2 cff; PPAR-a-ff:ff         |
| 2-aminoheptanoate                          | 6.2645 | 0.0012348  | 0.0028592 | Cpt2 cff-Atgl cff; ff:ff-Cpt2 cff; ff:ff Cre-Cpt2 cff; PPAR-a-Cpt2 cff   |
| oleoyl-arachidonoyl-glycerol181/2042       | 6.2261 | 0.0012798  | 0.0029551 | Cpt2 cff-Atgl cff; ff:ff Cre-Atgl cff; PPAR-a-Atgl cff                   |
| maltootiose                                | 6.1829 | 0.0013324  | 0.003068  | PPAR-a-Atgl cff; PPAR-a-Cpt2 cff; PPAR-a-ff:ff Cre                       |
| 3-hydroxydecanoate                         | 6.1635 | 0.0013569  | 0.0031155 | PPAR-a-Atgl cff; PPAR-a-ff:ff; PPAR-a-ff:ff Cre                          |
| 1-oleoyl-2-arachidonoyl-GPI181/204         | 6.1525 | 0.0013709  | 0.003139  | ff:ff Cre-Atgl cff; ff:ff Cre-ff:ff                                      |
| stearoyl-arachidonoyl-glycerol180/2042     | 6.139  | 0.0013884  | 0.0031701 | ff:ff-Cpt2 cff; PPAR-a-Cpt2 cff; ff:ff Cre-ff:ff; PPAR-a-ff:ff Cre       |
| 5-methylthioadenosineMTA                   | 6.1086 | 0.0014287  | 0.0032531 | PPAR-a-Cpt2 cff; PPAR-a-ff:ff; PPAR-a-ff:ff Cre                          |
| adenosine35-diphosphate                    | 6.0898 | 0.0014541  | 0.0033019 | Cpt2 cff-Atgl cff; ff:ff-Cpt2 cff                                        |
| N-acetylmethionine                         | 6.0839 | 0.0014623  | 0.0033112 | Cpt2 cff-Atgl cff; PPAR-a-Cpt2 cff                                       |
| 1-palmitoyl-GPE160                         | 6.0572 | 0.0014995  | 0.0033797 | PPAR-a-Atgl cff; ff:ff-Cpt2 cff; ff:ff Cre-ff:ff; PPAR-a-ff:ff           |
| 1-palmitoyl-GPC160                         | 6.0563 | 0.0015007  | 0.0033797 | Cpt2 cff-Atgl cff; ff:ff-Cpt2 cff; ff:ff Cre-ff:ff                       |
| FMN                                        | 6.0369 | 0.0015286  | 0.003433  | ff:ff-Atgl cff; ff:ff-Cpt2 cff; ff:ff Cre-ff:ff; PPAR-a-ff:ff            |
| 5-hydroxyhexanoate                         | 6.0282 | 0.0015411  | 0.0034517 | PPAR-a-Atgl cff; PPAR-a-Cpt2 cff; PPAR-a-ff:ff; PPAR-a-ff:ff Cre         |
| 5-methyltetrahydrofolate5MeTHF             | 5.9727 | 0.0016243  | 0.0036283 | ff:ff-Atgl cff; ff:ff-Cpt2 cff; ff:ff Cre-ff:ff; PPAR-a-ff:ff            |
| picolinate                                 | 5.9641 | 0.0016376  | 0.0036479 | Cpt2 cff-Atgl cff; PPAR-a-Cpt2 cff; PPAR-a-ff:ff                         |
| corticosterone                             | 5.9169 | 0.0017128  | 0.0038051 | ff:ff Cre-Cpt2 cff; ff:ff Cre-ff:ff; PPAR-a-ff:ff Cre                    |
| sphingomyelind180/200d160/220              | 5.8717 | 0.0017883  | 0.0039622 | PPAR-a-Cpt2 cff; PPAR-a-ff:ff Cre                                        |
| N2N5-diacetylornithine                     | 5.8677 | 0.0017952  | 0.0039668 | PPAR-a-Atgl cff; PPAR-a-Cpt2 cff; PPAR-a-ff:ff Cre                       |
| N1-methylinosine                           | 5.859  | 0.0018102  | 0.0039893 | PPAR-a-Cpt2 cff; PPAR-a-ff:ff Cre                                        |
| hypoxanthine                               | 5.8553 | 0.0018166  | 0.0039927 | ff:ff-Cpt2 cff; ff:ff Cre-ff:ff                                          |
| sphingosine                                | 5.8241 | 0.0018717  | 0.0041029 | ff:ff Cre-Atgl cff; PPAR-a-Atgl cff; ff:ff Cre-ff:ff; PPAR-a-ff:ff       |
| 1-stearoyl-2-arachidonoyl-GPC180/204       | 5.7811 | 0.0019507  | 0.0042646 | Cpt2 cff-Atgl cff                                                        |
| adenosine-5-diphosphoglucose               | 5.7745 | 0.0019631  | 0.0042804 | Cpt2 cff-Atgl cff; ff:ff-Cpt2 cff; PPAR-a-Cpt2 cff                       |
| 1-methylhistamine                          | 5.7689 | 0.0019737  | 0.0042862 | ff:ff-Atgl cff; ff:ff-Cpt2 cff; ff:ff Cre-ff:ff                          |
| biliverdin                                 | 5.7676 | 0.0019762  | 0.0042862 | PPAR-a-Atgl cff; PPAR-a-Cpt2 cff; PPAR-a-ff:ff; PPAR-a-ff:ff Cre         |
| glycosylceramided182/241d181/242           | 5.7646 | 0.0019818  | 0.0042869 | PPAR-a-Cpt2 cff; PPAR-a-ff:ff Cre                                        |
| hexadecadienoate162n6                      | 5.7115 | 0.0020861  | 0.0044904 | ff:ff-Cpt2 cff; PPAR-a-ff:ff                                             |
| hexadecenedioateC161-DC                    | 5.7112 | 0.0020868  | 0.0044904 | PPAR-a-Atgl cff; PPAR-a-ff:ff                                            |
| hexanoylglycineC6                          | 5.699  | 0.0021114  | 0.004521  | ff:ff Cre-Atgl cff; ff:ff-Cpt2 cff; ff:ff Cre-ff:ff                      |
| phenylalanine                              | 5.6987 | 0.002112   | 0.004521  | ff:ff Cre-ff:ff; PPAR-a-ff:ff                                            |
| taurocyamine                               | 5.6784 | 0.002154   | 0.0045989 | Cpt2 cff-Atgl cff; ff:ff-Cpt2 cff                                        |
| 2-phosphoglycerate                         | 5.6722 | 0.0021669  | 0.0046144 | PPAR-a-Cpt2 cff; PPAR-a-ff:ff Cre                                        |
| sphinganine                                | 5.6085 | 0.0023053  | 0.0048965 | ff:ff Cre-Atgl cff; ff:ff Cre-ff:ff                                      |
| homocitrulline                             | 5.5511 | 0.002438   | 0.005165  | Cpt2 cff-Atgl cff; ff:ff-Cpt2 cff; ff:ff Cre-Cpt2 cff; PPAR-a-Cpt2 cff   |
| 1-1-enyl-stearoyl-2-linoleoyl-GPEP-180/182 | 5.5269 | 0.0024964  | 0.0052752 | Cpt2 cff-Atgl cff; ff:ff Cre-Atgl cff; PPAR-a-Atgl cff                   |
| 1-palmitoyl-2-oleoyl-GPG160/181            | 5.5147 | 0.0025266  | 0.0053143 | ff:ff-Cpt2 cff; PPAR-a-ff:ff                                             |
| phenyllactatePLA                           | 5.5142 | 0.0025278  | 0.0053143 | PPAR-a-Atgl cff; PPAR-a-Cpt2 cff; PPAR-a-ff:ff; PPAR-a-ff:ff Cre         |
| S-adenosylmethionineSAM                    | 5.5106 | 0.0025367  | 0.0053193 | ff:ff Cre-Atgl cff; PPAR-a-Cpt2 cff; PPAR-a-ff:ff Cre                    |
| hyocholate                                 | 5.4301 | 0.0027457  | 0.005743  | ff:ff Cre-Atgl cff; PPAR-a-Atgl cff                                      |
| heptenedioateC71-DC                        | 5.4259 | 0.002757   | 0.0057519 | ff:ff-Cpt2 cff; PPAR-a-ff:ff; PPAR-a-ff:ff Cre                           |
| lactosyl-N-behenoyl-sphingosined181/220    | 5.402  | 0.0028229  | 0.0058745 | PPAR-a-Cpt2 cff; PPAR-a-ff:ff                                            |
| phosphoenolpyruvatePEP                     | 5.3944 | 0.0028441  | 0.0058976 | PPAR-a-Cpt2 cff; PPAR-a-ff:ff; PPAR-a-ff:ff Cre                          |
| guanidinosuccinate                         | 5.3929 | 0.0028483  | 0.0058976 | ff:ff Cre-Cpt2 cff; PPAR-a-ff:ff Cre                                     |
| tartronatehydroxymalonate                  | 5.3842 | 0.0028731  | 0.005934  | PPAR-a-Atgl cff; PPAR-a-ff:ff; PPAR-a-ff:ff Cre                          |
| linoleoyl-arachidonoyl-glycerol182/2042    | 5.3486 | 0.002976   | 0.0061311 | Cpt2 cff-Atgl cff; ff:ff-Atgl cff; ff:ff Cre-Atgl cff                    |
| asparagine                                 | 5.3171 | 0.0030705  | 0.00631   | ff:ff-Atgl cff; PPAR-a-ff:ff                                             |
| propionylcarnitineC3                       | 5.3022 | 0.0031165  | 0.0063885 | Cpt2 cff-Atgl cff; ff:ff Cre-Atgl cff; PPAR-a-Atgl cff                   |
| gamma-glutamyl-epsilon-lysine              | 5.2609 | 0.0032476  | 0.0066407 | PPAR-a-Atgl cff; PPAR-a-ff:ff                                            |
| palmitoylsphingomyelind181/160             | 5.2579 | 0.0032572  | 0.0066437 | Cpt2 cff-Atgl cff; ff:ff-Cpt2 cff                                        |
| o-Tyrosine                                 | 5.2523 | 0.0032755  | 0.0066645 | Cpt2 cff-Atgl cff; ff:ff-Atgl cff; ff:ff Cre-Atgl cff                    |
| N-palmitoyl-sphingosined181/160            | 5.2339 | 0.0033362  | 0.0067712 | PPAR-a-Atgl cff; PPAR-a-Cpt2 cff; PPAR-a-ff:ff                           |
| carboxyethyl-GABA                          | 5.1961 | 0.0034652  | 0.0070157 | Cpt2 cff-Atgl cff; ff:ff Cre-Atgl cff                                    |
| suberylglucine                             | 5.1879 | 0.0034935  | 0.0070557 | ff:ff Cre-Atgl cff; PPAR-a-Atgl cff; ff:ff Cre-ff:ff                     |
| nicotinate                                 | 5.1749 | 0.0035395  | 0.007131  | PPAR-a-Atgl cff; PPAR-a-ff:ff; PPAR-a-ff:ff Cre                          |
| 12-HETE                                    | 5.1399 | 0.0036661  | 0.007368  | ff:ff Cre-ff:ff; PPAR-a-ff:ff                                            |
| taurohydroxycholeicacid                    | 5.1307 | 0.0037005  | 0.0074191 | ff:ff-Atgl cff; PPAR-a-ff:ff                                             |
| serine                                     | 5.1276 | 0.0037122  | 0.0074243 | ff:ff-Atgl cff; PPAR-a-ff:ff                                             |
| erucate221n9                               | 5.1071 | 0.0037894  | 0.0075605 | Cpt2 cff-Atgl cff; ff:ff-Atgl cff; ff:ff Cre-Atgl cff                    |
| isocaprolylglycine                         | 5.0723 | 0.0039253  | 0.0078126 | ff:ff Cre-Atgl cff; ff:ff Cre-ff:ff                                      |
| myristoyl-linoleoyl-glycerol140/1822       | 5.0314 | 0.0040914  | 0.0081235 | ff:ff-Cpt2 cff; PPAR-a-ff:ff                                             |
| N6-acetyllysine                            | 5.0081 | 0.0041893  | 0.0082978 | Cpt2 cff-Atgl cff; ff:ff-Cpt2 cff; ff:ff Cre-Cpt2 cff; PPAR-a-Cpt2 cff   |
| indoleacetylglucine                        | 4.9421 | 0.0044806  | 0.0088535 | PPAR-a-Atgl cff; PPAR-a-Cpt2 cff; PPAR-a-ff:ff Cre                       |
| mannonate                                  | 4.9305 | 0.0045339  | 0.0089286 | ff:ff-Cpt2 cff; ff:ff Cre-ff:ff; PPAR-a-ff:ff                            |
| 7-methylguanine                            | 4.9291 | 0.0045403  | 0.0089286 | PPAR-a-Cpt2 cff; PPAR-a-ff:ff Cre                                        |
| 3-5-adenyladenosine                        | 4.8912 | 0.0047202  | 0.0092602 | Cpt2 cff-Atgl cff; ff:ff Cre-Atgl cff                                    |
| methylsuccinate                            | 4.8737 | 0.0048057  | 0.0094055 | PPAR-a-Atgl cff; PPAR-a-Cpt2 cff; PPAR-a-ff:ff Cre                       |
| leucine                                    | 4.8146 | 0.0051069  | 0.0099711 | ff:ff Cre-ff:ff; PPAR-a-ff:ff                                            |
| 3-indoxylsulfate                           | 4.8096 | 0.0051329  | 0.0099983 | ff:ff-Cpt2 cff; ff:ff Cre-ff:ff                                          |
| 78-dihydrofolate                           | 4.7828 | 0.0052771  | 0.010255  | Cpt2 cff-Atgl cff; ff:ff-Cpt2 cff                                        |

|                                                |        |           |          |                                                                  |
|------------------------------------------------|--------|-----------|----------|------------------------------------------------------------------|
| sebacateC10-DC                                 | 4.7617 | 0.0053932 | 0.010456 | PPAR-a-Atgl cff; PPAR-a-ff:ff; PPAR-a-ff:ff Cre                  |
| thiaminmonophosphate                           | 4.7339 | 0.0055508 | 0.010736 | Cpt2 cff-Atgl cff; ff:ff Cre-Atgl cff; PPAR-a-Atgl cff           |
| N-arachidoyl-sphingosined181/200               | 4.7086 | 0.0056988 | 0.010996 | PPAR-a-Atgl cff; PPAR-a-Cpt2 cff; PPAR-a-ff:ff                   |
| beta-hydroxyisovalerate                        | 4.6832 | 0.0058507 | 0.011263 | PPAR-a-Cpt2 cff; PPAR-a-ff:ff Cre                                |
| pyridoxal phosphate                            | 4.6568 | 0.0060138 | 0.011555 | ff:ff-Atgl cff; ff:ff Cre-ff:ff; PPAR-a-ff:ff                    |
| p-cresolsulfate                                | 4.6395 | 0.0061233 | 0.011733 | PPAR-a-ff:ff                                                     |
| 1-palmitoyl-2-linoleoyl-GPE160/182             | 4.6342 | 0.0061575 | 0.011771 | Cpt2 cff-Atgl cff; PPAR-a-Atgl cff                               |
| alpha-ketoglutaramate                          | 4.6219 | 0.0062369 | 0.011891 | PPAR-a-ff:ff Cre                                                 |
| betaine                                        | 4.62   | 0.0062493 | 0.011891 | ff:ff Cre-Atgl cff; ff:ff Cre-ff:ff                              |
| urea                                           | 4.6081 | 0.0063279 | 0.012013 | PPAR-a-Atgl cff; PPAR-a-ff:ff                                    |
| malonate                                       | 4.5964 | 0.006406  | 0.012133 | PPAR-a-ff:ff Cre                                                 |
| palmitoleate161n7                              | 4.5869 | 0.0064697 | 0.012225 | ff:ff-Cpt2 cff; ff:ff Cre-ff:ff                                  |
| N-2-hydroxypalmitoyl-sphingosined181/1602OH    | 4.5765 | 0.0065405 | 0.012331 | PPAR-a-Atgl cff; PPAR-a-Cpt2 cff; PPAR-a-ff:ff Cre               |
| genistein                                      | 4.5528 | 0.0067057 | 0.012613 | PPAR-a-Atgl cff; PPAR-a-Cpt2 cff; PPAR-a-ff:ff; PPAR-a-ff:ff Cre |
| valine                                         | 4.5448 | 0.0067618 | 0.01269  | ff:ff Cre-ff:ff; PPAR-a-ff:ff                                    |
| hydroxy-N6N6N6-trimethyllysine                 | 4.5393 | 0.0068012 | 0.012735 | PPAR-a-Atgl cff; PPAR-a-Cpt2 cff; PPAR-a-ff:ff Cre               |
| methylglucopyranosidealphabeta                 | 4.4971 | 0.0071105 | 0.013284 | ff:ff Cre-ff:ff                                                  |
| N1-Methyl-2-pyridone-5-carboxamide             | 4.4443 | 0.0075182 | 0.014004 | ff:ff Cre-ff:ff; PPAR-a-ff:ff Cre                                |
| 3-hydroxyoleoylcarnitine                       | 4.44   | 0.0075529 | 0.014004 | ff:ff-Atgl cff                                                   |
| orotate                                        | 4.439  | 0.0075609 | 0.014004 | Cpt2 cff-Atgl cff; ff:ff-Cpt2 cff                                |
| 23-dihydroxyisovalerate                        | 4.4386 | 0.007564  | 0.014004 | ff:ff Cre-ff:ff                                                  |
| oleoyl ethanolamide                            | 4.4355 | 0.0075884 | 0.014017 | PPAR-a-ff:ff                                                     |
| heptanoylglycine                               | 4.4335 | 0.0076051 | 0.014017 | PPAR-a-ff:ff; PPAR-a-ff:ff Cre                                   |
| palmitoyl-myristoyl-glycerol160/1402           | 4.4298 | 0.0076342 | 0.014039 | ff:ff Cre-Atgl cff; ff:ff Cre-ff:ff                              |
| palmitoyl ethanolamide                         | 4.4078 | 0.0078149 | 0.014339 | PPAR-a-Cpt2 cff; PPAR-a-ff:ff                                    |
| carnitine                                      | 4.4005 | 0.0078755 | 0.014418 | PPAR-a-Cpt2 cff; PPAR-a-ff:ff                                    |
| adenosine35-cyclicmonophosphatecAMP            | 4.3897 | 0.0079661 | 0.014551 | ff:ff-Cpt2 cff; ff:ff Cre-ff:ff                                  |
| dCMP                                           | 4.3665 | 0.0081658 | 0.014883 | ff:ff-Cpt2 cff; PPAR-a-Cpt2 cff                                  |
| xanthine                                       | 4.3476 | 0.0083314 | 0.015151 | ff:ff-Cpt2 cff                                                   |
| CDP-choline                                    | 4.3234 | 0.0085497 | 0.015514 | ff:ff Cre-Atgl cff; PPAR-a-ff:ff Cre                             |
| 12-HEPE                                        | 4.3148 | 0.0086283 | 0.015612 | PPAR-a-Cpt2 cff; PPAR-a-ff:ff                                    |
| pyruvate                                       | 4.3134 | 0.0086417 | 0.015612 | ff:ff-Cpt2 cff; PPAR-a-ff:ff                                     |
| lysine                                         | 4.3013 | 0.0087535 | 0.015779 | ff:ff Cre-Cpt2 cff; PPAR-a-Cpt2 cff                              |
| cadaverine                                     | 4.2515 | 0.0092334 | 0.016574 | PPAR-a-Atgl cff; PPAR-a-ff:ff; PPAR-a-ff:ff Cre                  |
| gamma-glutamylisoleucine                       | 4.2514 | 0.0092348 | 0.016574 | Cpt2 cff-Atgl cff; ff:ff Cre-Atgl cff                            |
| sphingomyelin182/242                           | 4.223  | 0.0095204 | 0.01705  | Cpt2 cff-Atgl cff; ff:ff Cre-Atgl cff                            |
| 4-hydroxy-nonanal-glutathione                  | 4.2095 | 0.0096598 | 0.017262 | Cpt2 cff-Atgl cff; ff:ff Cre-Atgl cff                            |
| glycerophosphonositol                          | 4.1684 | 0.010098  | 0.018006 | PPAR-a-ff:ff; PPAR-a-ff:ff Cre                                   |
| argininosuccinate                              | 4.1548 | 0.010247  | 0.018232 | Cpt2 cff-Atgl cff; PPAR-a-Cpt2 cff                               |
| arachidate200                                  | 4.1361 | 0.010457  | 0.018565 | Cpt2 cff-Atgl cff; ff:ff-Atgl cff; ff:ff Cre-Atgl cff            |
| 3-hydroxytetradecanedioate                     | 4.1269 | 0.010562  | 0.018711 | PPAR-a-Atgl cff; PPAR-a-Cpt2 cff; PPAR-a-ff:ff; PPAR-a-ff:ff Cre |
| N-acetylhomocitrulline                         | 4.1147 | 0.010702  | 0.018919 | Cpt2 cff-Atgl cff; ff:ff-Cpt2 cff; ff:ff Cre-Cpt2 cff            |
| 1-1-enyl-palmitoyl-2-arachidonoyl-GPEP-160/204 | 4.0538 | 0.011434  | 0.020148 | Cpt2 cff-Atgl cff                                                |
| retinal                                        | 4.0528 | 0.011447  | 0.020148 | PPAR-a-ff:ff                                                     |
| trigonellineN-methylnicotinate                 | 4.0416 | 0.011587  | 0.020351 | Cpt2 cff-Atgl cff; ff:ff-Cpt2 cff                                |
| arachidonate204n6                              | 4.0351 | 0.01167   | 0.020453 | Cpt2 cff-Atgl cff                                                |
| glyco-beta-muricholate                         | 4.0276 | 0.011765  | 0.020577 | ff:ff Cre-Atgl cff; PPAR-a-Atgl cff                              |
| hexadecatrienoate163n3                         | 4.0098 | 0.011996  | 0.020935 | PPAR-a-ff:ff                                                     |
| 5-galactosylhydroxy-L-lysine                   | 3.991  | 0.012245  | 0.021325 | PPAR-a-Atgl cff; PPAR-a-ff:ff                                    |
| palmitoylcarnitineC16                          | 3.9874 | 0.012293  | 0.021363 | ff:ff-Cpt2 cff; ff:ff Cre-ff:ff; PPAR-a-ff:ff                    |
| N-acetylhistidine                              | 3.9848 | 0.012329  | 0.02138  | PPAR-a-Cpt2 cff; PPAR-a-ff:ff Cre                                |
| proline                                        | 3.9815 | 0.012373  | 0.021412 | PPAR-a-Atgl cff; PPAR-a-ff:ff                                    |
| glycosylceramide181/200d161/220                | 3.9626 | 0.012632  | 0.021814 | PPAR-a-Atgl cff; PPAR-a-ff:ff                                    |
| urate                                          | 3.9301 | 0.01309   | 0.022511 | PPAR-a-ff:ff Cre                                                 |
| caproate60                                     | 3.9301 | 0.01309   | 0.022511 | Cpt2 cff-Atgl cff; PPAR-a-Cpt2 cff                               |
| myristate140                                   | 3.9231 | 0.013192  | 0.022638 | ff:ff-Cpt2 cff; ff:ff Cre-ff:ff                                  |
| anthranilate                                   | 3.9211 | 0.01322   | 0.022639 | ff:ff Cre-Atgl cff                                               |
| palmitate160                                   | 3.9128 | 0.013342  | 0.022801 | ff:ff-Atgl cff                                                   |
| 1-palmitoleoyl-GPC161                          | 3.9011 | 0.013515  | 0.023048 | Cpt2 cff-Atgl cff; ff:ff Cre-Atgl cff                            |
| lignoceroylsphingomyelin181/240                | 3.8881 | 0.01371   | 0.023332 | Cpt2 cff-Atgl cff                                                |
| ferulicacid4-sulfate                           | 3.8819 | 0.013804  | 0.023443 | PPAR-a-Atgl cff; PPAR-a-ff:ff Cre                                |
| saccharopine                                   | 3.8735 | 0.013931  | 0.023611 | PPAR-a-Cpt2 cff; PPAR-a-ff:ff Cre                                |
| gamma-carboxylglutamate                        | 3.8713 | 0.013966  | 0.023622 | PPAR-a-Atgl cff; PPAR-a-ff:ff Cre                                |
| N-acetylasparagine                             | 3.84   | 0.014457  | 0.024402 |                                                                  |
| anserine                                       | 3.8149 | 0.014863  | 0.025036 | PPAR-a-Cpt2 cff                                                  |
| O-methyltyrosine                               | 3.7787 | 0.015473  | 0.026009 | PPAR-a-ff:ff                                                     |
| dihomolinolenate203n3or3n6                     | 3.7703 | 0.015618  | 0.026199 | Cpt2 cff-Atgl cff; ff:ff Cre-Atgl cff; PPAR-a-Atgl cff           |
| lactosyl-N-nervonoyl-sphingosined181/241       | 3.7486 | 0.015999  | 0.026785 | Cpt2 cff-Atgl cff                                                |
| 2-deoxyadenosine5-monophosphate                | 3.7458 | 0.016048  | 0.026812 | ff:ff-Cpt2 cff                                                   |
| methionine                                     | 3.7273 | 0.016383  | 0.027316 | PPAR-a-ff:ff                                                     |
| 3-methylglutarate/2-methylglutarate            | 3.7199 | 0.016519  | 0.027487 | PPAR-a-Atgl cff; PPAR-a-ff:ff                                    |
| isoleucine                                     | 3.7074 | 0.016751  | 0.027817 | ff:ff-Cpt2 cff; PPAR-a-ff:ff                                     |
| 1-stearoyl-2-oleoyl-GPS180/181                 | 3.7046 | 0.016803  | 0.027846 | PPAR-a-Cpt2 cff                                                  |
| 2-O-methyluridine                              | 3.6697 | 0.017472  | 0.028897 | Cpt2 cff-Atgl cff                                                |
| N-glycylneuraminate                            | 3.6584 | 0.017693  | 0.029204 | PPAR-a-ff:ff Cre                                                 |
| 56-dihydrouridine                              | 3.6397 | 0.018069  | 0.029765 | PPAR-a-Cpt2 cff                                                  |
| deoxycholate                                   | 3.5986 | 0.018923  | 0.031109 | PPAR-a-ff:ff                                                     |
| thymidine                                      | 3.577  | 0.019387  | 0.031809 | ff:ff Cre-Atgl cff; ff:ff Cre-Cpt2 cff                           |
| prostaglandinF2alpha                           | 3.5717 | 0.019503  | 0.031936 | ff:ff-Cpt2 cff                                                   |
| 6-ketoprostaglandinF1alpha                     | 3.5583 | 0.0198    | 0.032358 | ff:ff-Cpt2 cff                                                   |
| N1-acetylspermidine                            | 3.5558 | 0.019856  | 0.032385 | PPAR-a-Atgl cff; PPAR-a-ff:ff                                    |
| 16or17-methylstearate190ori190                 | 3.5325 | 0.020386  | 0.033183 |                                                                  |
| hexadecaspingosined161                         | 3.5272 | 0.020509  | 0.033316 | Cpt2 cff-Atgl cff; PPAR-a-Cpt2 cff                               |
| 3-hydroxyhexanoylcarnitine1                    | 3.524  | 0.020583  | 0.033372 | PPAR-a-Atgl cff                                                  |
| dihomolinolenate202n6                          | 3.4946 | 0.021279  | 0.034431 | ff:ff Cre-Atgl cff                                               |
| heneicosapentaenoate215n3                      | 3.4622 | 0.022074  | 0.035649 | Cpt2 cff-Atgl cff; PPAR-a-Atgl cff                               |
| maltoetraose                                   | 3.4508 | 0.022363  | 0.036043 | PPAR-a-Cpt2 cff; PPAR-a-ff:ff Cre                                |
| 23-diphosphoglycerate                          | 3.3798 | 0.024245  | 0.039001 | Cpt2 cff-Atgl cff; PPAR-a-Cpt2 cff                               |
| taurocholate                                   | 3.3759 | 0.024355  | 0.039101 | ff:ff Cre-Atgl cff; PPAR-a-Atgl cff                              |
| N-acetylariginine                              | 3.368  | 0.024576  | 0.039359 |                                                                  |
| CMP                                            | 3.3667 | 0.024611  | 0.039359 |                                                                  |
| orotidine                                      | 3.3632 | 0.02471   | 0.03944  |                                                                  |
| 1-palmitoyl-2-oleoyl-GPC160/181                | 3.3409 | 0.025349  | 0.040381 | ff:ff Cre-ff:ff                                                  |
| docosadienoate222n6                            | 3.3147 | 0.026121  | 0.04153  | ff:ff Cre-Atgl cff                                               |
| 6-beta-hydroxylithocholate                     | 3.2968 | 0.026662  | 0.042309 | PPAR-a-ff:ff                                                     |
| 12-dipalmitoyl-GPE160/160                      | 3.2875 | 0.026949  | 0.042682 | ff:ff Cre-Atgl cff                                               |
| nisinate246n3                                  | 3.2503 | 0.028128  | 0.044464 | Cpt2 cff-Atgl cff; PPAR-a-Atgl cff                               |
| 2-deoxyuridine                                 | 3.2391 | 0.028493  | 0.044955 | ff:ff Cre-ff:ff                                                  |
| N-alpha-acetylmethionine                       | 3.2275 | 0.028875  | 0.04547  | PPAR-a-ff:ff Cre                                                 |
| 2-hydroxyphenylacetate                         | 3.2239 | 0.028997  | 0.045574 | PPAR-a-ff:ff Cre                                                 |
| 3-dehydrocholate                               | 3.2049 | 0.029639  | 0.046494 | PPAR-a-ff:ff Cre                                                 |
| behenate220                                    | 3.2026 | 0.029717  | 0.046529 |                                                                  |
| tauro-beta-muricholate                         | 3.1964 | 0.029933  | 0.046778 | ff:ff Cre-Atgl cff                                               |
| 5-dodecenoate121n7                             | 3.1939 | 0.03002   | 0.046825 |                                                                  |
| 3-hydroxysebacate                              | 3.1889 | 0.030192  | 0.047003 | PPAR-a-Atgl cff                                                  |
| 5-oxoproline                                   | 3.1849 | 0.030333  | 0.047034 | Cpt2 cff-Atgl cff; ff:ff Cre-Atgl cff                            |

|                                          |        |          |          |                                 |
|------------------------------------------|--------|----------|----------|---------------------------------|
| 2-butenoylglycine                        | 3.1848 | 0.030335 | 0.047034 | ff:ff-Cpt2 cff; ff:ff Cre-ff:ff |
| N-tetracosadienoyl-sphingosined181/242   | 3.1835 | 0.030383 | 0.047034 | PPAR-a-ff:ff                    |
| 3-hydroxyoctanoate                       | 3.1593 | 0.031246 | 0.048207 |                                 |
| histidylalanine                          | 3.159  | 0.031258 | 0.048207 |                                 |
| 1-carboxyethylsolenine                   | 3.1504 | 0.03157  | 0.048597 | PPAR-a-Atgl cff                 |
| N2-acetylN6-methyllysine                 | 3.1321 | 0.032247 | 0.049547 | PPAR-a-ff:ff Cre                |
| alanine                                  | 3.1303 | 0.032315 | 0.049558 | PPAR-a-ff:ff                    |
| 12-HHTrE                                 | 3.1277 | 0.032413 | 0.049615 | ff:ff-Cpt2 cff                  |
| tigloylglycine                           | 3.1234 | 0.032574 | 0.049768 |                                 |
| 1-1-enyl-palmitoyl-2-oleoyl-GPEP-160/181 | 3.1196 | 0.03272  | 0.049899 | PPAR-a-Atgl cff                 |

**Supplemental Table 1.**

| GENE name   | Forward primers            | Reverse primers             |
|-------------|----------------------------|-----------------------------|
| Pnpla2/Atgl | TGTGGCCTCATTCTCTAC         | TCGTGGGATGTTGGTGGAGCT       |
| Acot1       | GACAAGAAGAGCTTCATCCCGTG    | CATCAGCATAGAACTCGCTCTTCC    |
| Acot2       | AGTCAACGACGCAAAATGGTG      | GCTCTCAATCCTGTTGGC          |
| Cpt2        | CAACTCGTATACCCAAACCCAGTC   | GTTCCCATCTTGATCGAGGACATC    |
| Hadh        | TGCATTTGCCGAGCTTTAC        | GTTGGCCAGATTTCTGTTCA        |
| Lcad        | TTTCTCGGAGCATGACATTTT      | GCCAGCTTTTCCCAGACCT         |
| Fgf21       | CTGCTGGGGTCTACCAAG         | CTGCGCTACCCTGTTCC           |
| Acox1       | ACGCCACTTCCTTGCTCTTC       | AGATTGGTAGAAATTGCTGCAAA     |
| Cpt1b       | GGTCCATAAGAAACAAGACCTCC    | CAGAAAGTACTCAGCCAGGAAAG     |
| Phospho1    | AAGCACATCATCCAGTCCCTC      | TTGGTCTCAGCTGTCATCCAG       |
| Elovl7      | CATCGAGGACTGTGCGTTTTT      | CCAGGATGATGGTTTGTGGCA       |
| fabp3       | ACCTGGAAGCTAGTGGACAG       | TGATGGTAGTAGGCTTGGTCAT      |
| plin4       | GACAAGTGGGAACAAGCTCAG      | TCCATGGTCATGTCTGTCTATCT     |
| Atf3        | CGAAGACTGGAGCAAAATGAT      | CAGGTTAGCAAAATCCTCAAAC      |
| gnmbp       | CATTCCCATCTCGAAGGTGAAA     | AAATGGCAGAGTCGTTGAGGA       |
| Myc         | ATGCCCTCAACGTGAACCTTG      | CGCAACATAGGATGGAGAGCA       |
| col4a1      | GCCAAGTGTGCATGAGAAGA       | AGCGGGGTGTGTTAGTTACG        |
| col5a1      | CTCCAACACCTCCAATCCAG       | GTCTCCAATCCCCTCAAAG         |
| elastin     | TGGTATTGGTGGCATCGG         | CCTTGGCTTTGACTCCTGTG        |
| Lumican     | GAATGTAAGTCCCCACAG         | GGTCAAGAATGAGCCACTGC        |
| mmp12       | GCTAGAAGCAACTGGGCAAC       | ACCGCTTCATCCATCTTGAC        |
| cd68        | TTCTGCTGTGGAAATGCAAG       | CAATGATGAGAGGCAGCAAG        |
| F4/80       | TTGTACGTGCAACTCAGGACT      | GATCCAGAGTGTGATGCAA         |
| CD11        | CTGGATAGCCTTTCTTCTGCTG     | GCACACTGTGTCGGAATCA         |
| TNFa        | ATGCTGGGACAGTGACCTGG       | CCTTGATGGTGGTGCATGAG        |
| Nos2        | GTTCTCAGCCCAACAATAAAGA     | GTGGACGGGTGCATGTAC          |
| Tgfb        | ATGTCACGTTAGGGGCTC         | GGCTTGCATACTGTGCTGTATAG     |
| a-sma       | GACGTACAAGTGGTATTGTG       | TCAGGATCTCATGAGGTAG         |
| nrpl3       | CTCCAACATTCTCTGACCAG       | ACAGATTGAAGTAAGGCCGG        |
| pnpla3      | GGATCACAGGATCTGGGCTA       | TGCACTCCCTGGTGTGTTA         |
| gdf15       | CGCCCTGGCAATGCCTGAACAACGAC | GCAGCGGGTAGGCTTCGGGGAGACC   |
| angptl3     | AGCAAGACAACAGCATAAGAGAACTC | TGAGCTGCTTTTCTATTTCTTTATCTG |
| 18S         | GCAATTATCCCATGAACG         | GGCCTCACTAAACCATCAA         |
| Ehhadh      | ATGGCTGAGTATCTGAGGCTG      | GGTCCAAACTAGCTTTCTGGAG      |
| Pdk4        | ATCTAACATCGCCAGAATTAACC    | GGAACGTACACAATGTGGATTG      |
| ppara       | GCGTACGGCAATGGCTTTAT       | GAACGGCTTCTCAGGTTCTT        |
| Cyclo a     | TCCGACTGTGGACAGCTCTA       | ATTGCGAGCAGATGGGGTAG        |

PMID: 24820416

PMID: 29320561

PMID: 29070054

PMID: 25060692

PMID: 26305978

PMID: 29390963

Supplemental Table 2.
